# Supplementary material for: Spatial Distribution Patterns and Driving Factors of Plant Biomass and Leaf N, P Stoichiometry on the Loess Plateau of China
Source: MDPI journal article supplement (doi:10.3390/plants10112420), 2021-11-09
Supplement: s1 [file s1]

## Supplementary files

**Table S1.** Basic information of the experimental plots.

| Vegetation zone | Study site | MAT (°C) | MAP (mm) | Slope (°) | Altitude (m) | Soil type | Main herbaceous species                                                                                              |
|-----------------|------------|----------|----------|-----------|--------------|-----------|----------------------------------------------------------------------------------------------------------------------|
| FZ              | A          | 9.11     | 633      | 28        | 1100         | I         | <i>Stipabungeana</i> , <i>Rubia cordifolia</i> , <i>Phragmites australis</i> , <i>Taraxacum mongolicum</i>           |
|                 | B          | 8.99     | 595      | 17        | 1105         | I         | <i>Stipabungeana</i> , <i>Dracocephalum moldavica</i> , <i>Patrinia scabiosaefolia</i> , <i>Phragmites australis</i> |
|                 | C          | 8.74     | 579      | 13        | 1015         | I         | <i>Stipabungeana</i> , <i>Lespedeza davurica</i> , <i>Taraxacum mongolicum</i> , <i>Incarvillea sinensis</i>         |
|                 | D          | 8.63     | 553      | 21        | 1100         | I         | <i>Stipabungeana</i> , <i>Lespedeza davurica</i> , <i>Taraxacum mongolicum</i> , <i>Phragmites australis</i>         |
| FS              | E          | 8.41     | 481      | 19        | 1300         | I         | <i>Stipabungeana</i> , <i>Melilotus officinalis</i> , <i>Artemisia gmelinii</i> , <i>Lespedeza davurica</i>          |
|                 | F          | 8.22     | 483      | 11        | 1330         | I         | <i>Stipabungeana</i> , <i>Melilotus officinalis</i> , <i>Saussurea amurensis</i> , <i>Lespedeza davurica</i>         |
|                 | G          | 7.94     | 467      | 15        | 1300         | I         | <i>Lespedeza davurica</i> , <i>Artemisia gmelinii</i> , <i>Bidens pilosa</i>                                         |
|                 | H          | 7.38     | 446      | 8         | 1277         | II        | <i>Artemisia gmelinii</i> , <i>Phragmites australis</i> , <i>Stipabungeana</i> , <i>Heteropappus altaicus</i>        |
| SZ              | I          | 6.93     | 428      | 11        | 1500         | II        | <i>Stipabungeana</i> , <i>Artemisia capillary</i> , <i>Dracocephalum moldavica</i> , <i>Lespedeza davurica</i>       |
|                 | J          | 6.88     | 411      | 16        | 1500         | II        | <i>Stipabungeana</i> , <i>Lespedeza davurica</i> , <i>Artemisia desertorum</i> , <i>Scorzoneradivaricata</i>         |
|                 | K          | 6.79     | 404      | 12        | 1600         | II        | <i>Polygala tenuifolia</i> , <i>Erodium stephanianum</i> , <i>Dracocephalum moldavica</i> , <i>Vicia sepium</i>      |
|                 | L          | 6.61     | 392      | 12        | 1400         | II        | <i>Artemisia ordosica</i> , <i>Stipabungeana</i> , <i>Setaria viridis</i> , <i>Artemisia scoparia</i>                |
| SD              | M          | 6.5      | 384      | 23        | 1100         | III       | <i>Artemisia desertorum</i> , <i>Heteropappus altaicus</i> , <i>Artemisia scoparia</i> , <i>Lespedeza davurica</i>   |
|                 | N          | 6.34     | 351      | 27        | 1148         | III       | <i>Artemisia desertorum</i> , <i>Artemisia scoparia</i> , <i>Astragalus adsurgens</i>                                |
|                 | O          | 6.12     | 332      | 29        | 1205         | III       | <i>Artemisia desertorum</i> , <i>Artemisia scoparia</i> , <i>Lespedeza davurica</i>                                  |

<sup>S1</sup> FZ, Forest zone; FS, Forest-steppe zone; SZ, Steppe-zone; SD, Steppe-desert zone; MAT, mean annual temperature; MAP, mean annual precipitation; I, Loessial soil, II, Loess sandy soil; III, Aeolian sandy soil.

**Table S2.** Comparisons of AGB, BGB and R/S of Loess Plateau with other temperate grasslands in the world.

| Region/temperate grassland | Biomass (g·m <sup>-2</sup> ) |         | R/S  |        |            | Reference  |
|----------------------------|------------------------------|---------|------|--------|------------|------------|
|                            | AGB                          | BGB     | Mean | Median | Range      |            |
| Global                     | 430.2                        | 1810.9  | 4.50 | 4.20   | 1.59~9.90  | [3]        |
| Europe                     | 377.00                       | 1903.08 | 3.70 | 3.40   | 1.10~6.90  | [32]       |
| North America              | 207.80                       | 1469.60 | 4.40 | 3.70   | 1.20~10.30 | [32]       |
| Japan                      | 742.00                       | 1415.10 | 4.30 | 4.30   | 1.60~6.90  | [32]       |
| China                      | 104.80                       | 570.20  | 6.30 | 5.70   | 0.40~14.30 | [33]       |
| Inner Mongolia             | 135.30                       | 775.20  | —    | —      | —          | [34]       |
| Loess Plateau              | 148.98                       | 469.20  | 2.89 | 3.09   | 0.93~4.50  | This study |

**Table S3.** Comparisons of leaf N, P stoichiometry around the world.

| Region        | Leaf N |      | Leaf P |      | Leaf N/P |      | Reference  |
|---------------|--------|------|--------|------|----------|------|------------|
|               | Mean   | CV   | Mean   | CV   | Mean     | CV   |            |
| Global        | 20.09  | 0.43 | 1.77   | 0.63 | 13.80    | 0.68 | [21]       |
| China         | 19.09  | 0.42 | 1.56   | 0.74 | 15.39    | 0.54 | [23]       |
| China         | 20.20  | 0.42 | 1.45   | 0.99 | 16.30    | 0.57 | [22]       |
| Loess Plateau | 24.10  | 0.35 | 1.60   | 0.34 | 15.40    | 0.26 | [24]       |
| Loess Plateau | 25.79  | 0.17 | 1.37   | 0.13 | 18.71    | 0.10 | This study |

**Table S4.** Linear mixed-effect model showing the differences in herb biomass and leaf N, P stoichiometry on the Loess Plateau.

| Items                   | Fixed effect (Vegetation type) |                   | Random effect (Sampling site) |
|-------------------------|--------------------------------|-------------------|-------------------------------|
|                         | t <sub>1,24</sub>              | p-value           | SD                            |
| AGB (g/m <sup>2</sup> ) | <b>4.348</b>                   | <b>&lt; 0.001</b> | 0.458                         |
| BGB (g/m <sup>2</sup> ) | <b>8.246</b>                   | <b>&lt; 0.001</b> | 0.017                         |
| R/S                     | <b>2.840</b>                   | <b>0.009</b>      | 0.036                         |
| Leaf N (mg/g)           | <b>16.049</b>                  | <b>&lt; 0.001</b> | 0.146                         |
| Leaf P (mg/g)           | <b>6.630</b>                   | <b>&lt; 0.001</b> | 0.613                         |
| Leaf N/P                | -0.645                         | 0.525             | 0.118                         |

<sup>S4</sup> Bold indicates statistical significance at  $p < 0.05$ . AGB represents above-ground biomass, BGB, below-ground biomass; R/S, root to shoot ratio; Leaf N, leaf N content; Leaf P, leaf P content; Leaf N/P, leaf N/P ratio.
